# Supplementary material for: Serum Phosphorus as a Risk Factor of Metabolic Syndrome in the Elderly in Taiwan: A Large-Population Cohort Study
Source: PubMed Central journal article supplement (PMC6835508; doi:10.3390/nu11102340), 2019-10-02
Supplement: nutrients-11-02340-s001.pdf [file nutrients-11-02340-s001.pdf]

Supplementary Table S1. Numbers of metabolic syndrome, diabetes mellitus and hypertension by age group after follow-up

|        |                        | <i>Group Age 1-39</i> | <i>Group Age 40-59</i> | <i>Group Age 60-</i> |
|--------|------------------------|-----------------------|------------------------|----------------------|
| Number | Metabolic syndrome (N) | 56                    | 79                     | 51                   |
|        | Diabetes mellitus (N)  | 7                     | 42                     | 30                   |
|        | Hypertension (N)       | 65                    | 121                    | 74                   |
